# Supplementary material for: Self-Supported 3D PtPdCu Nanowires Networks for Superior Glucose Electro-Oxidation Performance
Source: MDPI journal article supplement (doi:10.3390/molecules28155834), 2023-08-02
Supplement: s1 [file s1]

## Supplementary Materials

# Self-Supported 3D PtPdCu Nanowire Networks for Superior Glucose Electro-Oxidation Performance

Kaili Wang 1,2,3†, Shuang He 4†, Bowen Zhang 1, Zhen Cao 2, Tingting Zhou 2, Jia He 3\* and Ganghui Chu 1\*

<sup>1</sup> Laboratory of Xinjiang Native Medicinal and Edible Plant Resources Chemistry, Kashi University, Xinjiang, China

<sup>2</sup> College Chemistry & Chemistry Engineering, Weifang University, Shandong, China

<sup>3</sup> School of Materials Science and Engineering, Tianjin University of Technology, Tianjin, China

<sup>4</sup> First Teaching Hospital of Tianjin University of Traditional Chinese Medicine, Tianjin, China.

\*Correspondence: cghks5@126.com; hejia@tjut.edu.cn

†These authors contribute equally.

---

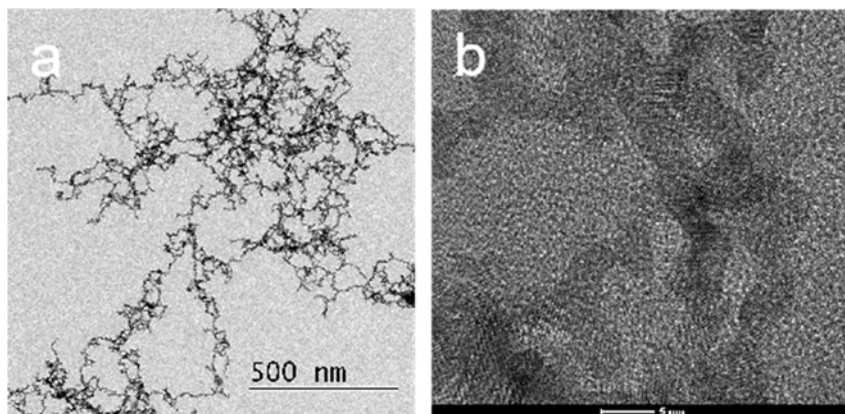

**Figure S1.** (a) TEM image of PtPdCu NWs, (b) HRTEM image of PtPdCu NWs.

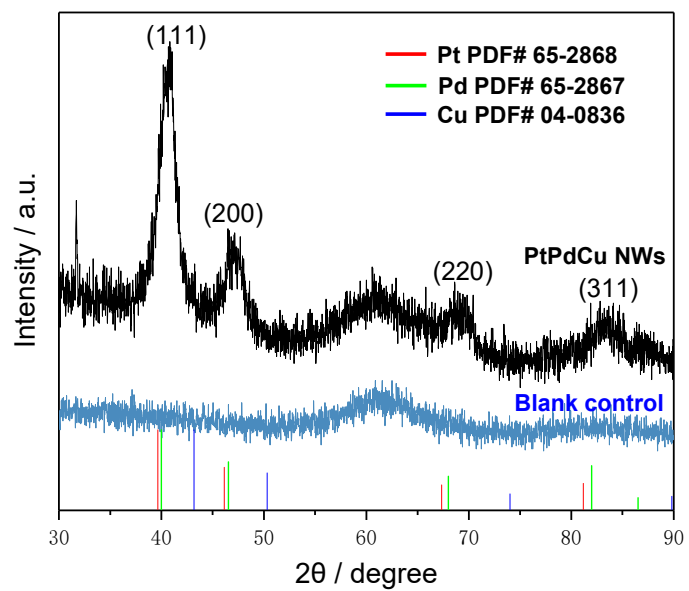

**Figure S2.** XRD pattern of PtPdCu NWs.

---

| Z  | Element | Family | Atomic Fraction (%) | Atomic Error (%) | Mass Fraction (%) | Mass Error (%) | Fit error (%) |
|----|---------|--------|---------------------|------------------|-------------------|----------------|---------------|
| 29 | Cu      | K      | 26.32               | 3.51             | 14.06             | 1.32           | 0.51          |
| 46 | Pd      | L      | 46.84               | 7.75             | 41.92             | 5.69           | 0.34          |
| 78 | Pt      | L      | 26.84               | 4.30             | 44.02             | 5.70           | 0.22          |

**Figure S3.** The Pt/Pd/Cu atomic ratio of the PtPdCu NWs catalysts was determined by STEM-EDS spectrum.

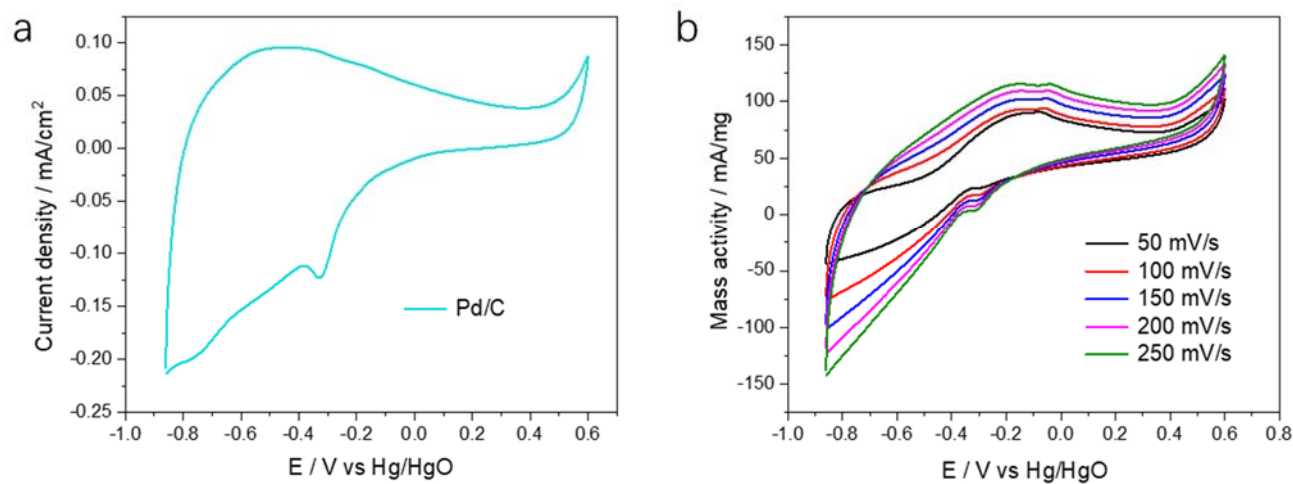

**Figure S4.** (a) CVs of the commercial Pd/C in 0.5 M KOH with scan rate of 50 mV/s; (b) CVs of the Pd/C in 0.5 M KOH containing 0.1 M glucose at different scan rates from 50 mV/s to 250 mV/s.

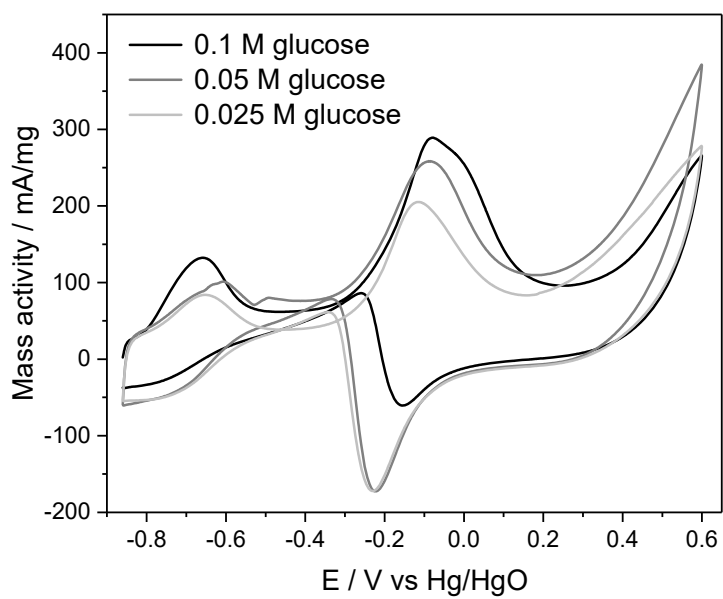

**Figure S5.** Glucose oxidation curves of the PtPdCu NWs catalyst in 0.1, 0.05, and 0.025 M glucose + 0.1 M KOH.

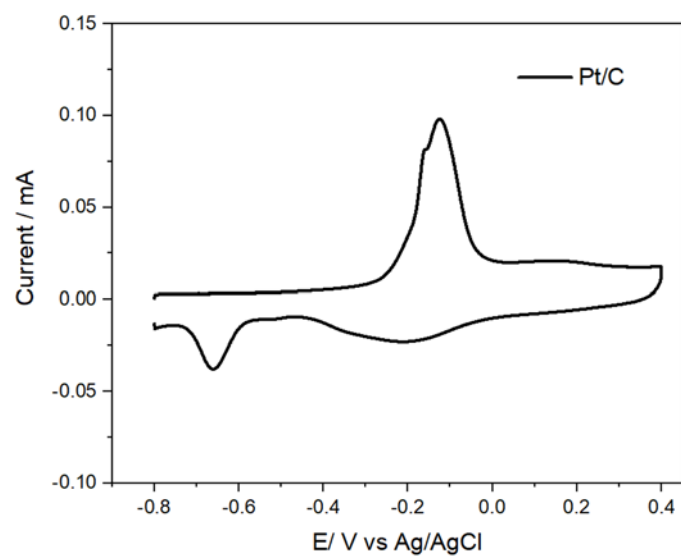

**Figure S6.** CO-stripping curves for Pt/C catalyst.

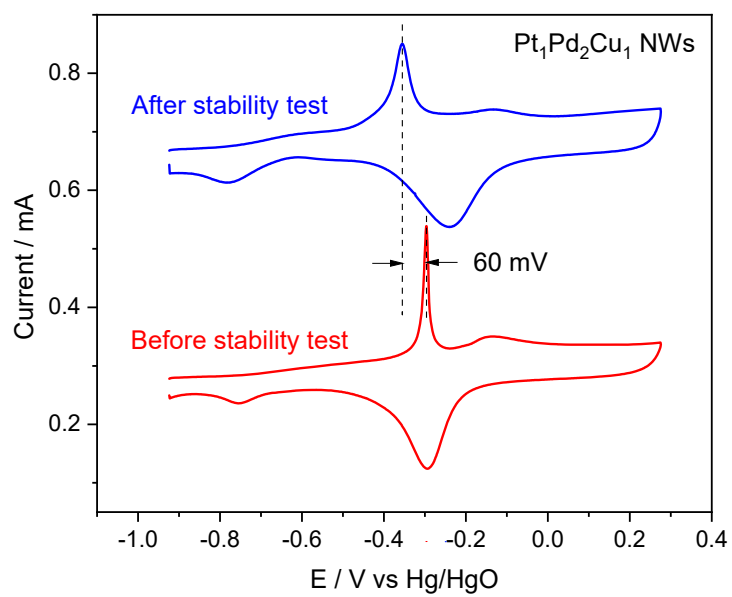

**Figure S7.** CO-stripping curves for Pt<sub>1</sub>Pd<sub>2</sub>Cu<sub>1</sub> NWs catalyst before and after the stability test.

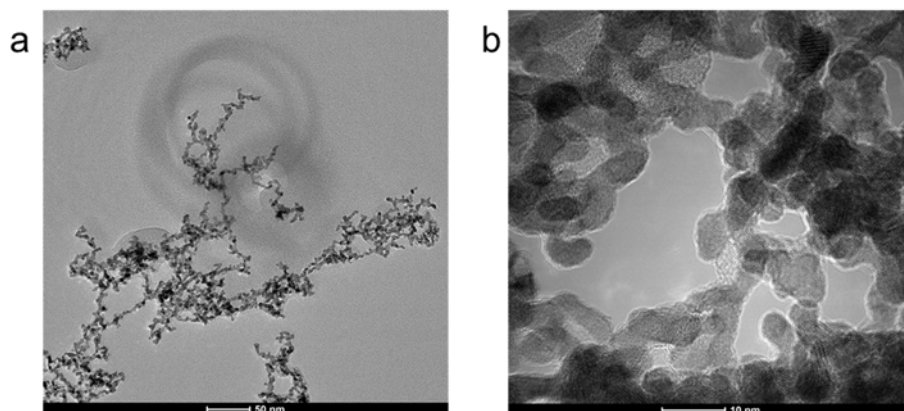

**Figure S8. (a,b)** TEM images of PtPdCu NWs catalysts after CA tests for GOR.



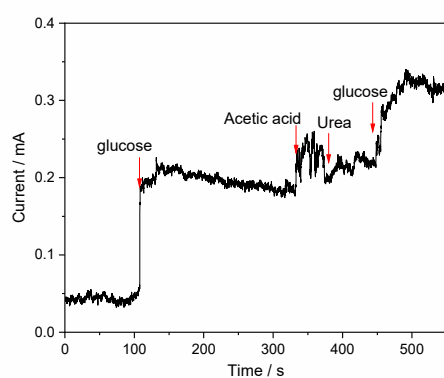

Figure S9. Amperometric response of the composite films by a consecutive addition of 1 mM of each of the indicated analytes.

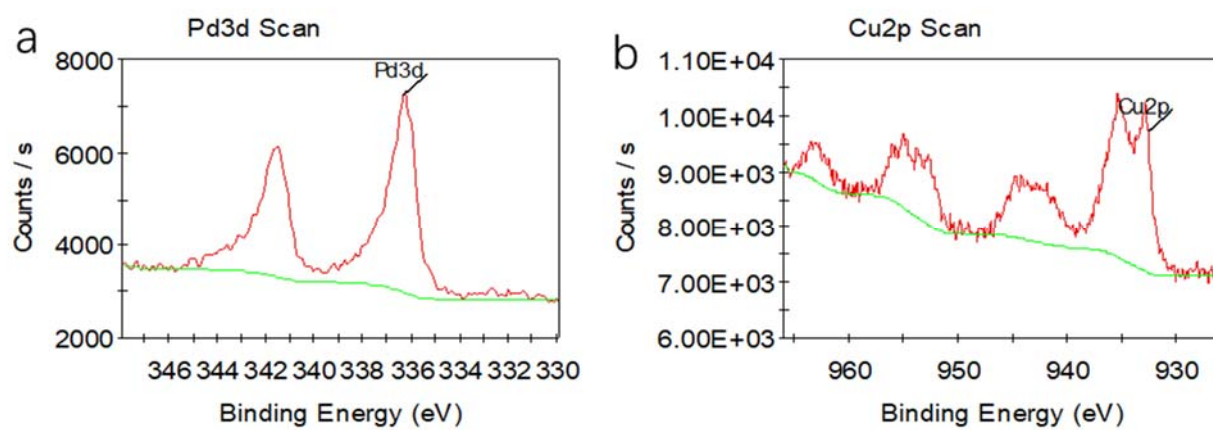

**Figure S10.** XPS patterns for (a) Pd 3d and (b) Cu 2p region of the as-prepared PtPdCu NWs.

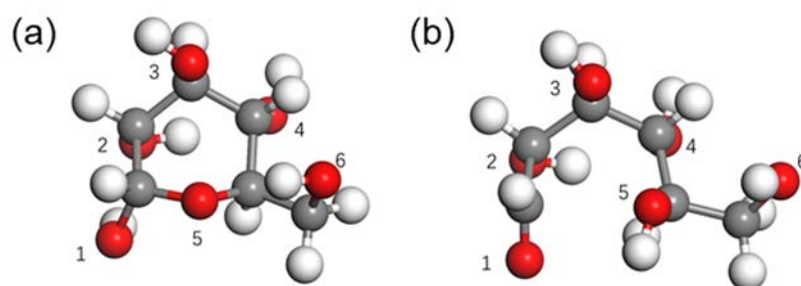

**Figure S11.** The two configurations of glucose molecules: (a) Ring and (b) Ring-first opened step.

In the Figure S11a, gray, red, and white spheres represent C, O, and H atoms, respectively. The sequence number represents the arrangement order of the O atoms. According to references [1, 2], the adsorption forms of glucose on the metal active sites Pd and Ni of two different materials are both at position 6, indicating that metals have greater adsorption potential on position 6th O, so the same adsorption site is used in this article.

In the Figure S11b, the reference information and order are the same as those described on the above. According to reference [3], the ring-opening mode of glucose molecular structure when it is not adsorbed on the surface is that the C atom bonded to the O atom at position 5 and the O atom at position 1 are broken. The bond O-H of the OH group at position 1 is broken, and the H atom moves to the O atom at position 5, thereby breaking the bond and opening the ring of the glucose molecule. At the beginning, when glucose was adsorbed on the surface, the surface of pure metal and ternary alloy materials strongly interacted with the active sites of 6th O atom. The active sites 1-5 were basically unaffected and the charge environment did not significantly change. Therefore, the same glucose ring opening method was selected. Due to the strong adsorption of metals on glucose molecules, after ring opening, the O site 6 still binds to the metal surface, but the original ring binding mode is destroyed. The O atom at position 5 loses the binding effect of the 1st O atom connecting the C atom and moves towards the 6th O atom and the metal surface, while the C atom connected to the 1st O atom loses the 5th binding force and extends away from the metal surface due to the molecular orbital hybridization force.

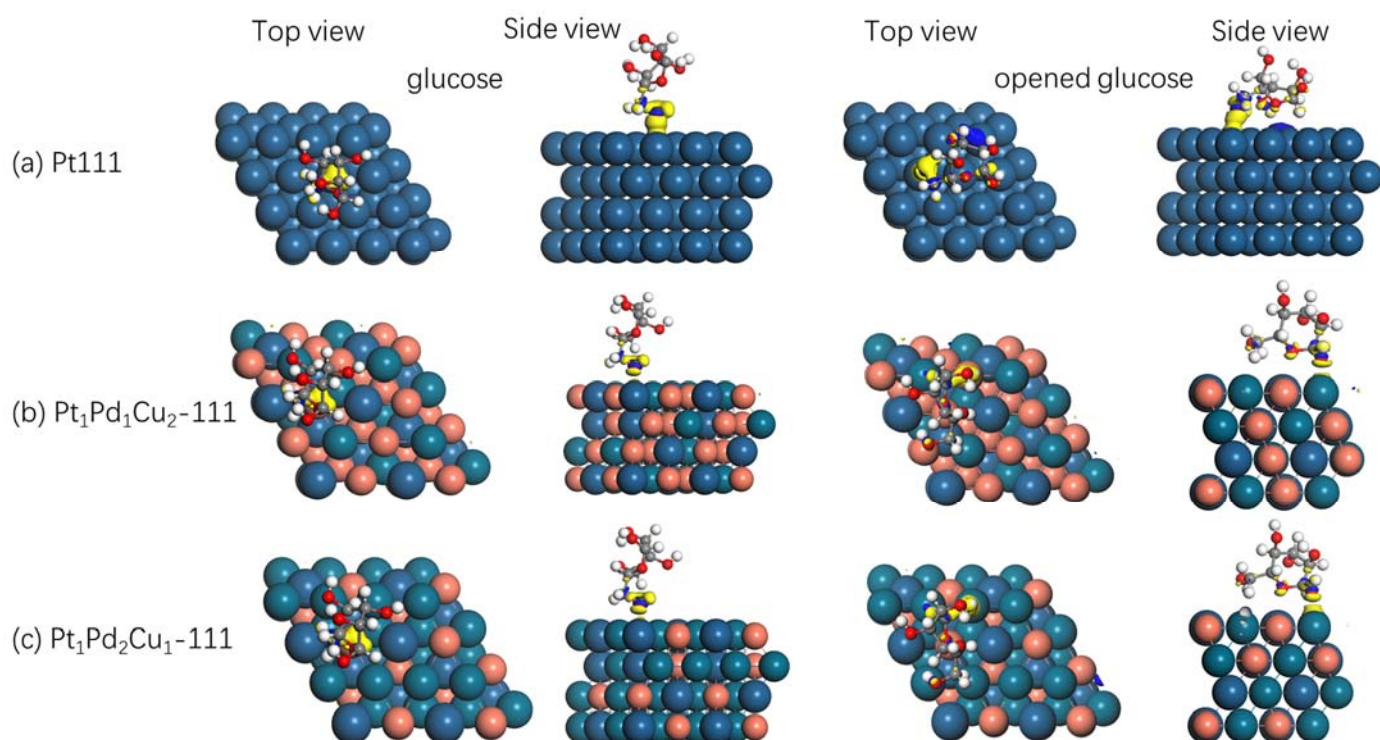

**Figure S12.** Electron density and Mulliken charge of (a) Pt<sub>111</sub>, (b) Pt<sub>1</sub>Pd<sub>1</sub>Cu<sub>2</sub>-111 and (c) Pt<sub>1</sub>Pd<sub>2</sub>Cu<sub>1</sub>-111. Two columns on the left represent glucose molecule adsorb on the three different models from the top and side views, and two columns on the right represent opened-glucose molecule adsorb on the three different models from the top and side views. The blue area in the figure represents electron accumulation, and the yellow area represents electron loss. Each arrow represents the direction of electron transfer, and the number next to the arrow represents the relative transfer quantity. Blue and red balls represent Pt and Cu atoms respectively, and the remaining balls are Pd atoms.

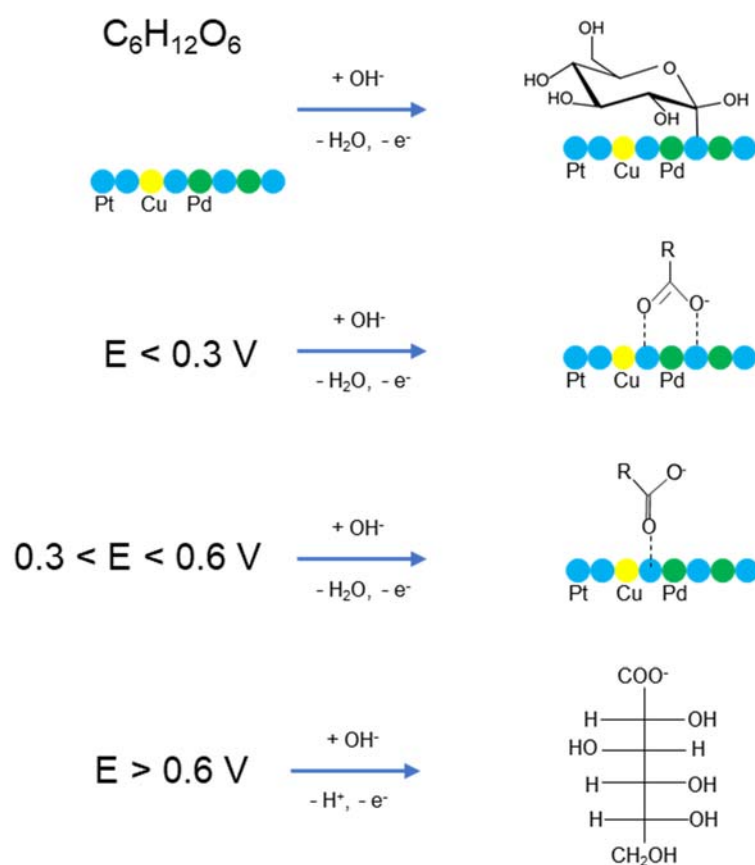

**Figure S13.** Reaction mechanism of the electrochemical oxidation of glucose on Pt-based catalysts surfaces in basic electrolyte, and the potential was vs RHE.

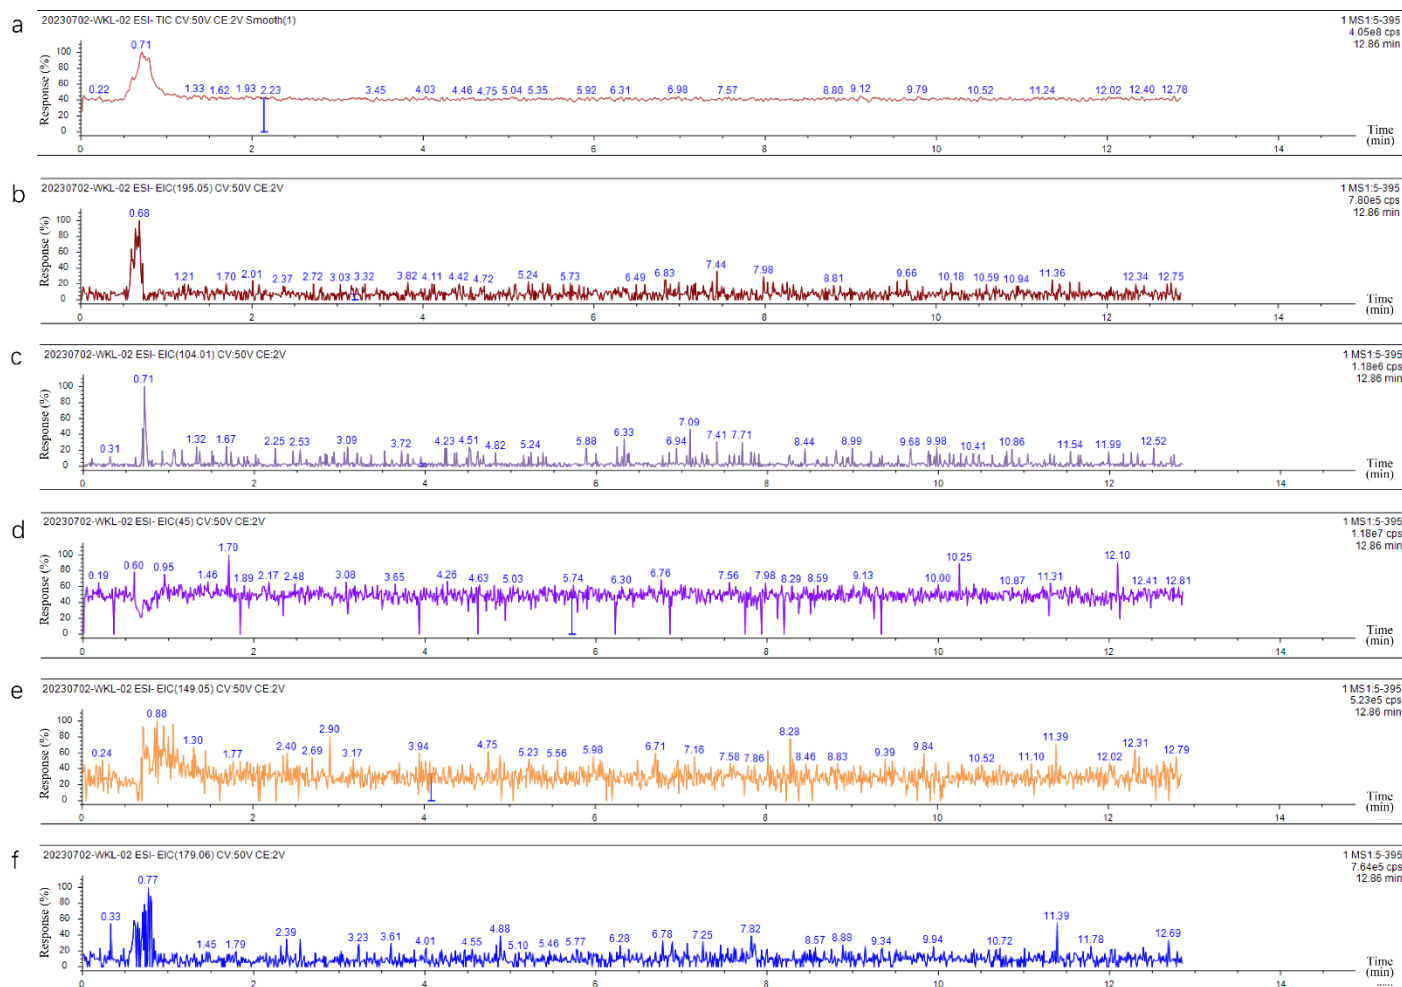

**Figure S14.** (a) Total ion current chromatogram of the electrolyte for GOR performed on PtPdCu NWs catalyst. (b) Gluconic acid ion current chromatogram. (c) Glucaric acid ion current chromatogram. (d) Formic acid ion current chromatogram. (e) Arabinose ion current chromatogram. (f) Glucose ion current chromatogram.

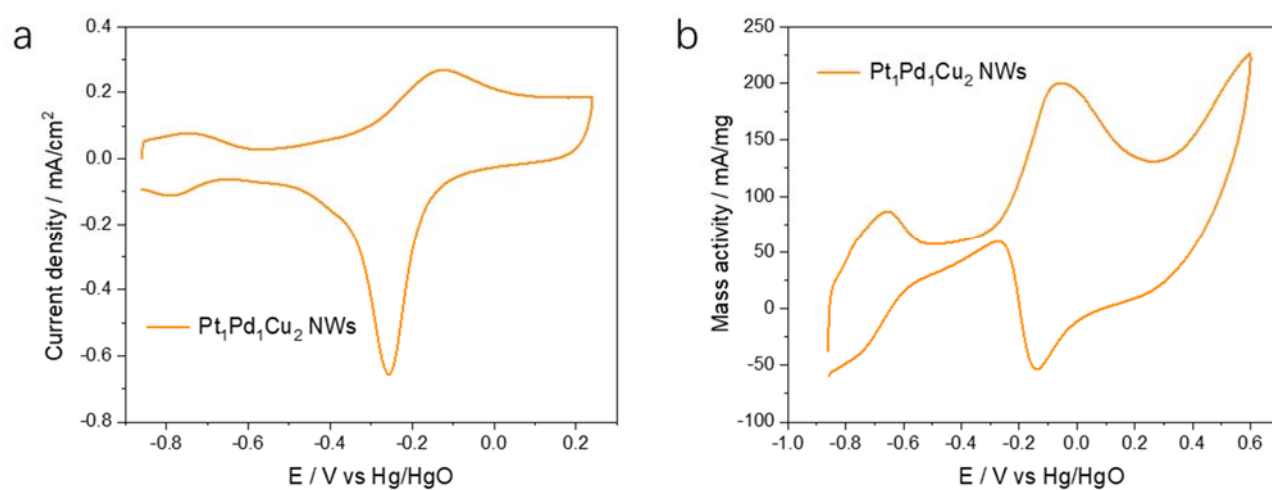

**Figure S15.** (a) CVs of the Pt<sub>1</sub>Pd<sub>1</sub>Cu<sub>2</sub> NWs in 0.5 M KOH with scan rate of 50 mV/s; (b) CVs in 0.5 M KOH containing 0.1 M glucose with scan rate of 50 mV/s.

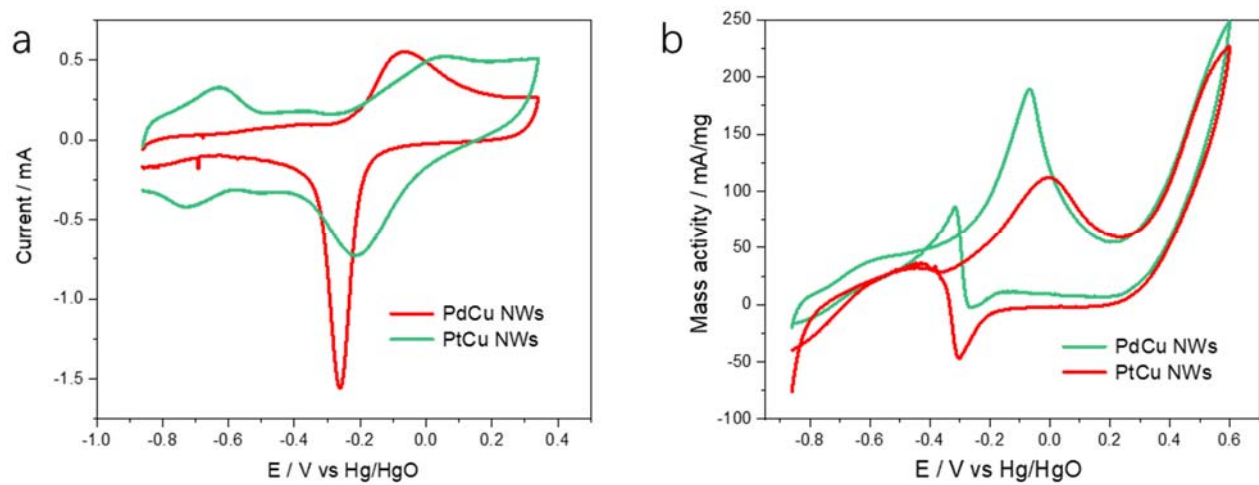

**Figure S16.** (a) CVs of the PdCu NWs and PtCu NWs in 0.5 M KOH with scan rate of 50 mV/s; (b) CVs in 0.5 M KOH containing 0.1 M glucose with scan rate of 50 mV/s.



**Table S1.** Comparison of electrocatalytic performance of Pt-based or Pd-based electrocatalysts toward GOR.

| Electrocatalysts                      | Electrolyte                  | ECSA (m <sup>2</sup> /g) | Peak current density (A/mg) | References                                      |
|---------------------------------------|------------------------------|--------------------------|-----------------------------|-------------------------------------------------|
| Ir@Pt                                 | 0.5 M NaOH + 50 mM glucose   | 135.2                    | 0.128                       | Catal. Commun. 2015;69:114                      |
| Pd <sub>3</sub> Sn/Se-C               | 0.1 M KOH+0.5 M glucose      | 27.1                     | ~0.18                       | Electrochim. Acta 244 (2017) 16–25              |
| Pd <sub>3</sub> Sn/C                  | 0.1 M KOH+0.5 M glucose      | 20.1                     | ~0.15                       |                                                 |
| Au@Pt core-shell mesoporous nanoballs | 0.1 M NaOH + 5 mM glucose    | 19                       | 0.016                       | J Phys Chem C 2015;119:27529                    |
| Au@Pt NBs                             | 0.1 M NaOH+5 mM glucose      | 19                       | 0.016                       | J. Phys. Chem. C 2015, 119, 27529–27539         |
| Pt NBs                                | 0.1 M NaOH+5 mM glucose      | 8                        | 0.009                       |                                                 |
| Pd-Bi/C                               | 0.5 M NaOH+0.5 M glucose     | 14                       | 2.08                        | J. Power Sources 287 (2015) 323e333             |
| AuPtPd                                | 0.1 M NaOH+10 mM glucose     | 50.8                     | 1.01                        | Intern. J. Hydrogen Energy 45(2020) 19163-19173 |
| AuPt                                  | 0.1 M NaOH+10 mM glucose     | 99.2                     | 0.74                        |                                                 |
| PtPd                                  | 0.1 M NaOH+10 mM glucose     | 79.4                     | 0.56                        |                                                 |
| Pt/C                                  | 0.1 M NaOH+10 mM glucose     | 82.5                     | 0.29                        |                                                 |
| AuPd/rGO                              | 0.1 M NaOH+10 mM glucose     | -                        | 0.037                       | Electrochim. Acta 2016;212:864.                 |
| Pd nanocubes                          | 0.1 M NaOH+5 mM glucose      | -                        | 0.018                       | Electrochim. Acta 2016;211:1024.                |
| AuPt                                  | 0.1 M NaOH+10 mM glucose     | 71.8                     | 0.457                       | Catal. Sci. Technol. 2017;7:2819.               |
| PtPdCu NWs                            | 0.5 M KOH with 0.1 M glucose | 41.6                     | 0.29                        | This work                                       |

**Table S2.** The details of the EIS fitting for Pt/C and PtPdCu NWs at -0.2 V vs Hg/HgO.

| Pt/C        |              | PtPdCu NWs  |              |
|-------------|--------------|-------------|--------------|
| $Z'/\Omega$ | $Z''/\Omega$ | $Z'/\Omega$ | $Z''/\Omega$ |
| 20.901      | 0.00477      | 21.947      | 0.03085      |
| 20.901      | 0.00577      | 21.947      | 0.03734      |
| 20.901      | 0.007        | 21.947      | 0.04521      |
| 20.901      | 0.00847      | 21.947      | 0.05471      |
| 20.901      | 0.01026      | 21.947      | 0.06621      |
| 20.901      | 0.01243      | 21.948      | 0.08014      |
| 20.901      | 0.01506      | 21.948      | 0.09699      |
| 20.901      | 0.01824      | 21.948      | 0.11736      |
| 20.901      | 0.02213      | 21.949      | 0.1422       |
| 20.901      | 0.02682      | 21.949      | 0.17206      |
| 20.901      | 0.03242      | 21.95       | 0.20768      |
| 20.901      | 0.03935      | 21.951      | 0.25169      |
| 20.901      | 0.0476       | 21.953      | 0.30394      |
| 20.901      | 0.05774      | 21.954      | 0.36796      |
| 20.901      | 0.06995      | 21.957      | 0.44477      |
| 20.901      | 0.08471      | 21.96       | 0.53732      |
| 20.901      | 0.10262      | 21.965      | 0.64923      |
| 20.902      | 0.1243       | 21.971      | 0.78413      |
| 20.902      | 0.15057      | 21.978      | 0.94685      |
| 20.902      | 0.18238      | 21.989      | 1.1429       |
| 20.902      | 0.22124      | 22.002      | 1.381        |
| 20.902      | 0.26803      | 22.02       | 1.6659       |
| 20.903      | 0.32395      | 22.043      | 2.0043       |
| 20.903      | 0.39315      | 22.075      | 2.42         |
| 20.904      | 0.4755       | 22.115      | 2.9107       |
| 20.905      | 0.5766       | 22.169      | 3.5079       |
| 20.907      | 0.69572      | 22.237      | 4.205        |
| 20.909      | 0.84649      | 22.331      | 5.0782       |
| 20.912      | 1.0238       | 22.451      | 6.0937       |
| 20.916      | 1.2457       | 22.612      | 7.3486       |
| 20.922      | 1.4933       | 22.805      | 8.7305       |
| 20.93       | 1.8286       | 23.086      | 10.575       |
| 20.941      | 2.1996       | 23.419      | 12.583       |
| 20.956      | 2.6818       | 23.883      | 15.148       |
| 20.974      | 3.2109       | 24.424      | 17.909       |
| 20.997      | 3.8426       | 25.108      | 21.141       |
| 21.035      | 4.7868       | 26.195      | 25.856       |

---

|        |        |        |        |
|--------|--------|--------|--------|
| 21.073 | 5.6464 | 27.24  | 30.039 |
| 21.126 | 6.8143 | 28.727 | 35.576 |
| 21.195 | 8.2218 | 30.602 | 42.048 |
| 21.282 | 9.914  | 32.951 | 49.573 |
| 21.393 | 11.954 | 35.886 | 58.316 |
| 21.533 | 14.408 | 39.526 | 68.42  |
| 21.71  | 17.358 | 44.015 | 80.05  |
| 21.933 | 20.91  | 49.527 | 93.404 |
| 22.214 | 25.176 | 56.239 | 108.65 |
| 22.567 | 30.295 | 64.365 | 125.98 |
| 23.012 | 36.445 | 74.17  | 145.63 |
| 23.575 | 43.856 | 85.967 | 167.83 |
| 24.282 | 52.736 | 99.939 | 192.65 |
| 25.173 | 63.39  | 116.25 | 220.31 |
| 26.295 | 76.173 | 134.95 | 251.22 |
| 27.707 | 91.475 | 156.11 | 286.04 |
| 29.486 | 109.83 | 180.22 | 326.02 |
| 31.724 | 131.8  | 208.29 | 372.46 |
| 34.536 | 158.08 | 242.29 | 426.63 |
| 38.073 | 189.53 | 285.19 | 489.36 |
| 42.536 | 227.06 | 340.71 | 560.16 |
| 48.081 | 271.72 | 413.07 | 636.95 |
| 54.829 | 325.12 | 506.42 | 715.56 |
| 63.547 | 389.5  | 623.81 | 789.42 |
| 75.664 | 465.93 | 764.28 | 849.35 |
| 91.643 | 554.56 | 923.28 | 886.49 |
| 108.89 | 656.21 | 1091.8 | 894.17 |
| 122.64 | 776.11 | 1257.8 | 870.51 |
| 131.2  | 926.51 | 1410.6 | 819.04 |
| 140.43 | 1121.4 | 1542.1 | 747.5  |
| 162.64 | 1372   | 1648.9 | 665.02 |
| 213.13 | 1686.2 | 1732   | 579.65 |
| 309.43 | 2068.1 | 1794.1 | 497.52 |
| 472.98 | 2519.5 | 1839.3 | 422.23 |
| 730.98 | 3037.1 | 1871.7 | 355.38 |
| 1117   | 3608.3 | 1894.5 | 297.17 |
| 1661.6 | 4198.4 |        |        |
| 2388.2 | 4755.9 |        |        |
| 3295.6 | 5210.6 |        |        |
| 4342.8 | 5489   |        |        |

---

## References

1. Naik, K.K.; Gangan, A.; Chakraborty, B.; Nayak, S.K.; Rout, C.S. Enhanced Nonenzymatic Glucose-Sensing Properties of Electrodeposited NiCo(2)O(4)-Pd Nanosheets: Experimental and DFT Investigations. *ACS Appl Mater Interfaces* **2017**, *9*, 23894–23903.
2. Souissi, M.; Sahara, R.; Darvishi, S.; Ahadian, S. Responses to comments on “Ni nanoparticle-decorated reduced graphene oxide for non-enzymatic glucose sensing: An experimental and modeling study [Electrochim. Acta 240 (2017) 388–398]”. *Electrochim. Acta* **2019**, *300*, 145–149.
3. Ju, Z.; Zhang, Y.; Zhao, T.; Xiao, W.; Yao, X. Mechanism of Glucose–Fructose Isomerization over Aluminum-Based Catalysts in Methanol Media. *ACS Sustain. Chem. Eng.* **2019**, *7*, 14962–14972.
